# Supplementary material
Source: publisher figshare collection journal article supplement (https://frontiersin.figshare.com/ndownloader/files/14799995)
Supplement: Supplementary file [file 14799995]

**Supplementary Figure 2** Conditional LOD profile plots of detected QTL for shoot and root traits and first three principle components of a *P. hallii* RIL mapping population resulting from the final model of stepwise QTL mapping.

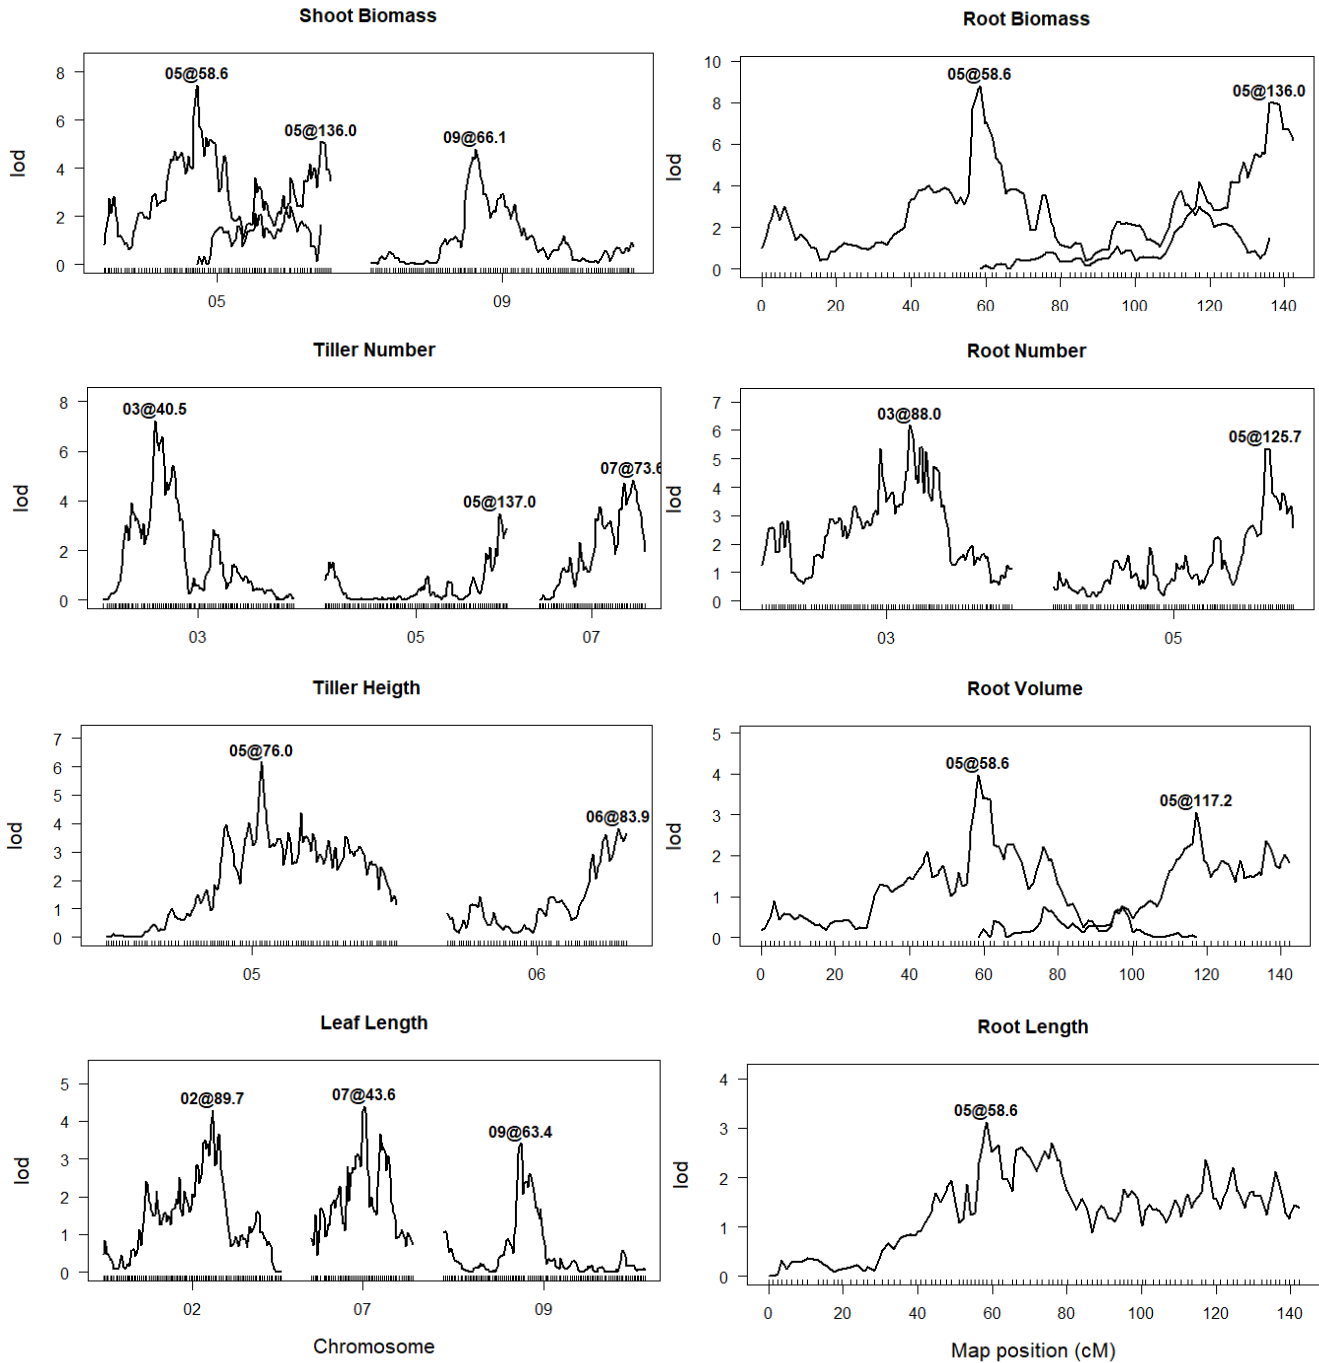

**Panicle Emergence**

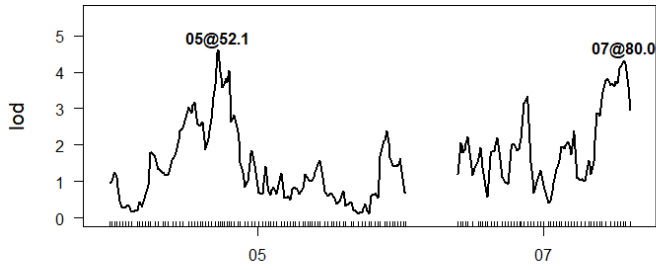

**Specific Leaf Area**

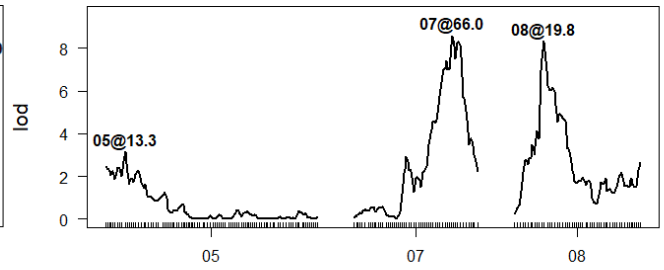

**Root Diameter**

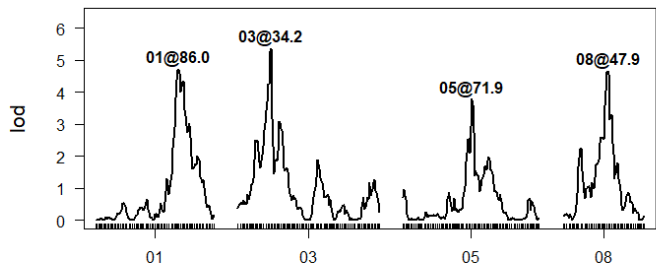

**Root Tissue Density**

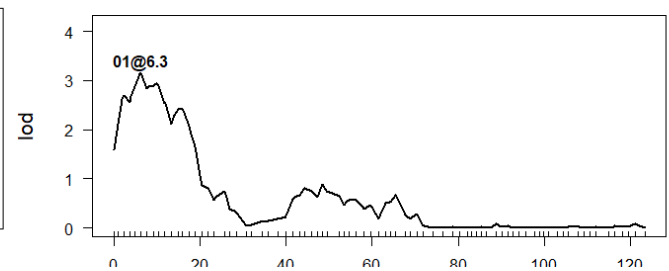

**Specific Root Length**

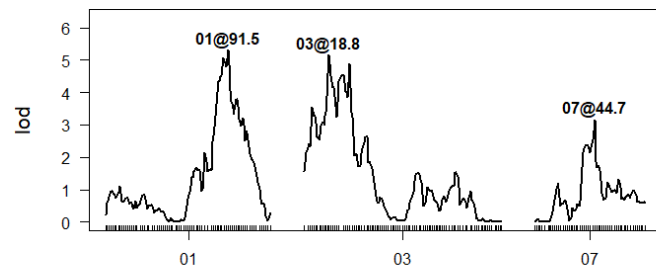

**Root Mass Ratio**

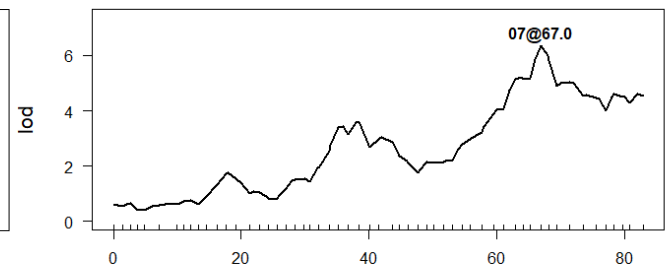

**PC1**

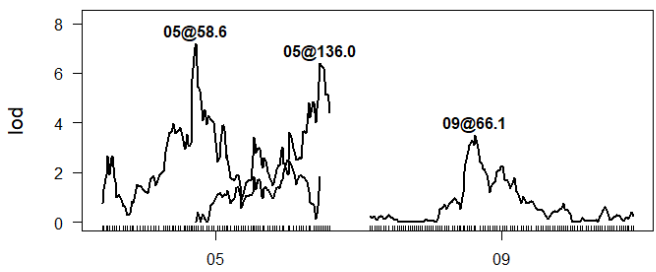

**PC2**

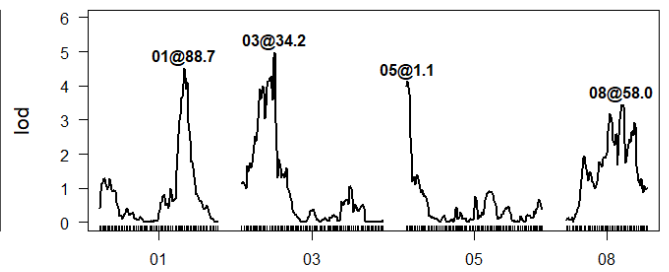

**PC3**

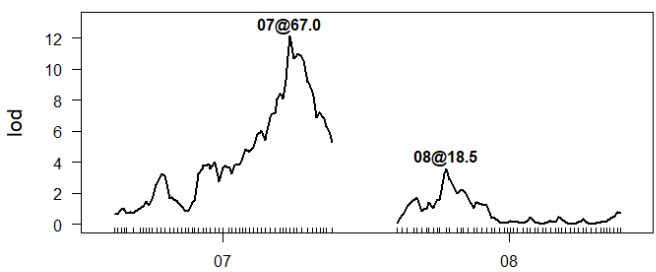

**Chromosome**
